# Supplementary material
Source: PubMed Central journal article supplement (PMC7365754)
Supplement: NIHMS1580078-supplement-Supplemental_Figure_1.pdf [file NIHMS1580078-supplement-Supplemental_Figure_1.pdf]

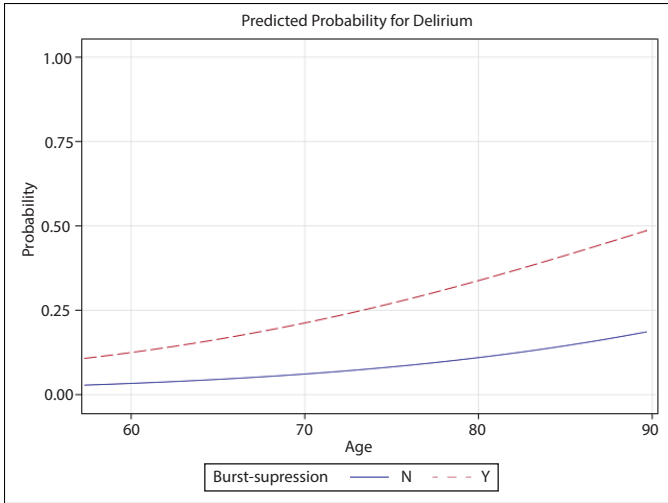

Supplemental Figure 1. Predicted Probability of Delirium in no burst-suppression group (continuous blue line) and burst-suppression group (dashed red line) as a function of age. The predicted probability of delirium was less than 0.5 across all age ranges.
