# Supplementary material
Source: PubMed Central journal article supplement (PMC7365754)
Supplement: NIHMS1580078-supplement-Supplemental_Figure_2.pdf [file NIHMS1580078-supplement-Supplemental_Figure_2.pdf]

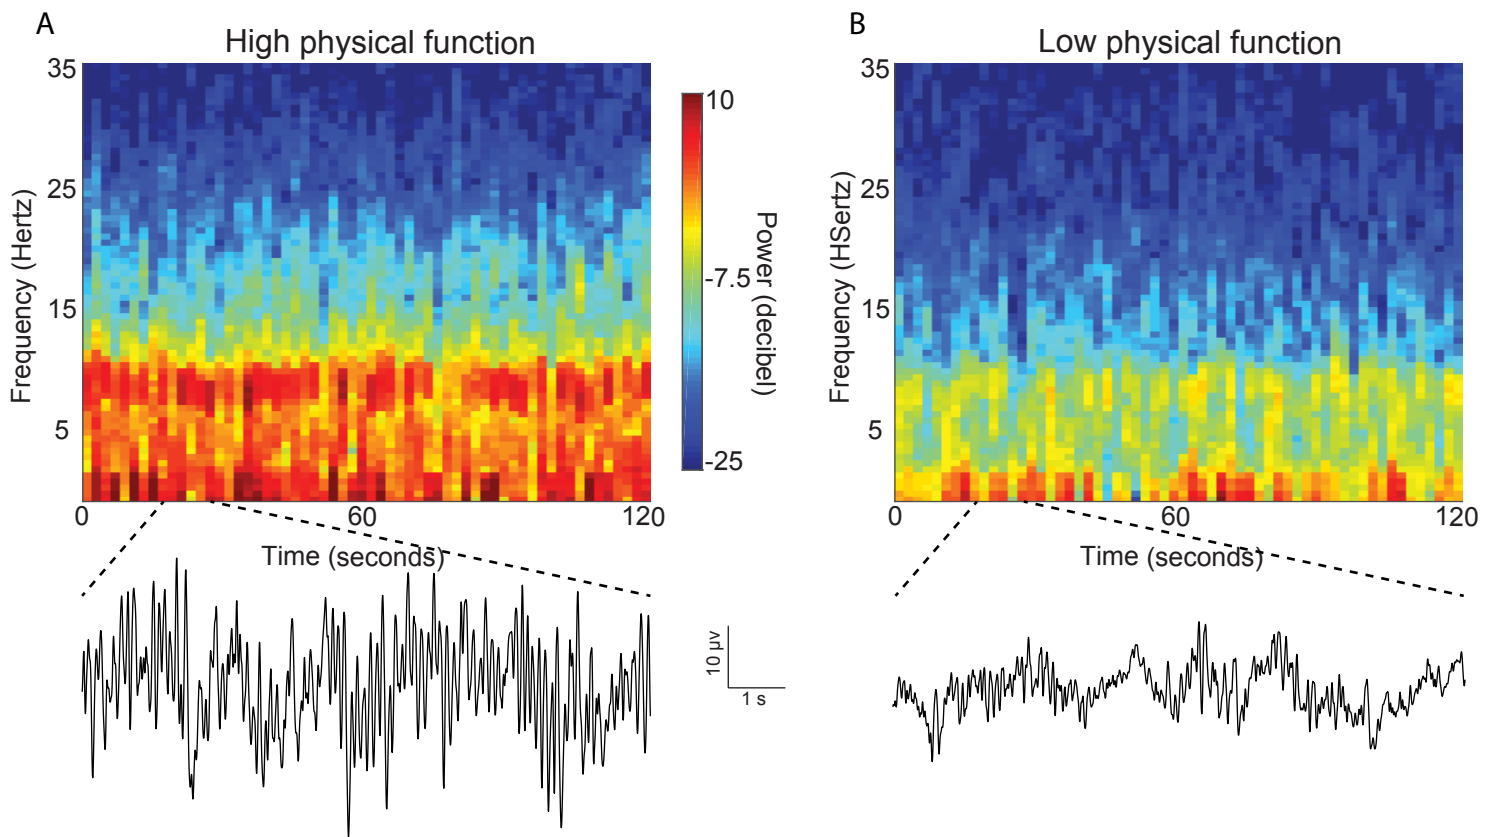

Supplementary Figure 2. Representative individual data obtained during isofurane general anesthesia of low versus high physical function subjects. A. Spectrogram (top panel) and time-series data (bottom panel) of a 62-year-old male patient with abbreviated Montreal Cognitive Assessment score of 20, physical function score of 49, and isofurane concentration of 0.8% who did not develop burst-suppression during cardiopulmonary bypass. B. Spectrogram (top panel) and time-series data (bottom panel) of a 62-year-old male patient with abbreviated Montreal Cognitive Assessment score of 20, physical function score of 40, and isofurane concentration of 0.8% who developed burst-suppression during cardiopulmonary bypass.
