# Supplementary material
Source: PubMed Central journal article supplement (PMC7365754)
Supplement: NIHMS1580078-supplement-Supplemental_Figure_3.pdf [file NIHMS1580078-supplement-Supplemental_Figure_3.pdf]

### abbreviated Montreal Cognitive Assessment

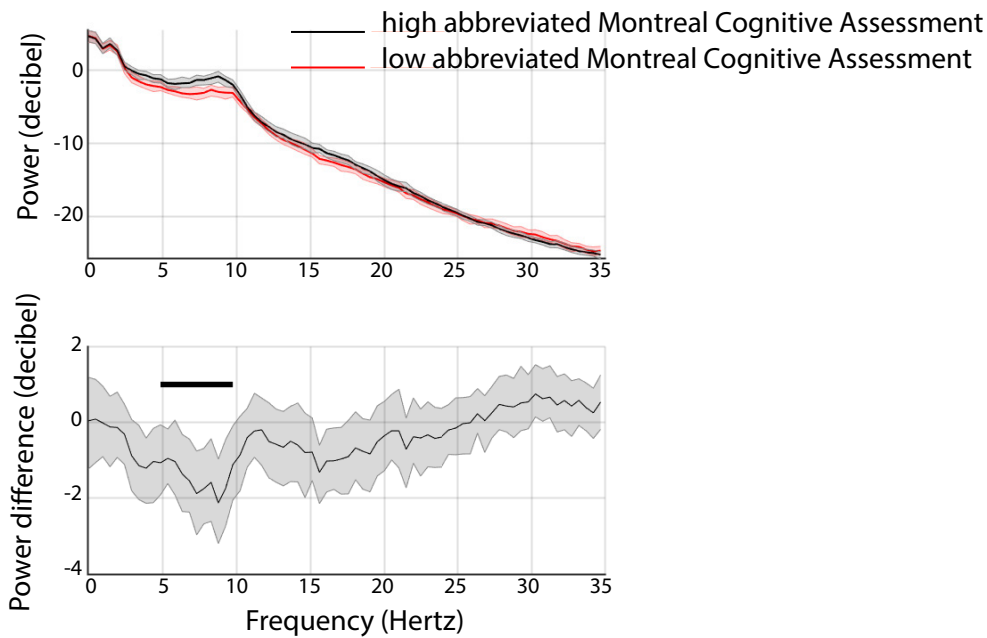

Supplemental Figure 3. Group level spectra abbreviated Montreal Cognitive Assessment. Power spectra of high abbreviated Montreal Cognitive Assessment (black) versus low abbreviated Montreal Cognitive Assessment (red) groups (top panel). Electroencephalogram power was significantly greater in the high physical function group between 4.9 to 9.8 Hz (bottom panel, bootstrap difference of mean). Median bootstrapped spectra presented with 99% confidence intervals. Horizontal solid black lines represent significantly different frequencies.
